# Supplementary material
Source: publisher figshare collection journal article supplement (https://acs.figshare.com/ndownloader/files/25685867)
Supplement: Supplementary file 1 [file 25685867]

## **Supporting Information**

# **Experimental and Molecular Dynamics Simulation Study on the Primary Nucleation of Penicillamine Racemate and Enantiomers in the Mixture Solvent of Water and Ethanol**

Dongbo Wang,<sup>†</sup> Jie Lu,<sup>†,\*</sup> Leilei Zhang,<sup>†</sup> Fanfan Fan,<sup>†</sup> Lijuan Zhang,<sup>†</sup> Xijian Liu,<sup>†</sup> Haikuan Yuan,<sup>†</sup> and Xueyan  
Zhu<sup>‡</sup>

<sup>†</sup> School of Chemistry and Chemical Engineering, Shanghai University of Engineering Science, Shanghai  
201620, China

<sup>‡</sup> China State Institute of Pharmaceutical Industry, Shanghai 201203, China

\* Corresponding authors: [lujie@sues.edu.cn](mailto:lujie@sues.edu.cn) (J. Lu).

## Results and Discussion

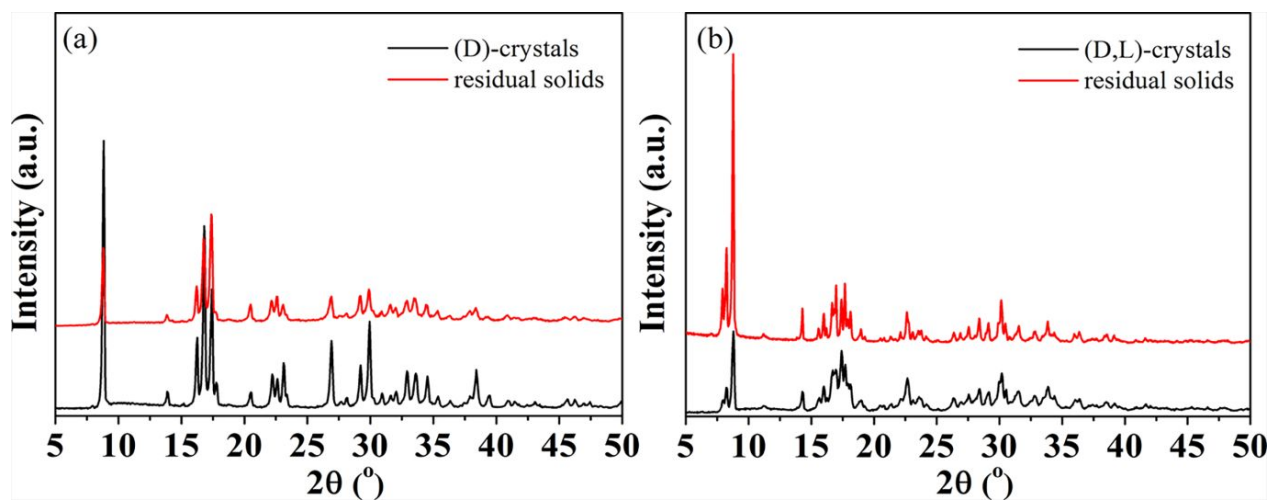

**Figure S1.** PXRD patterns of the raw crystals and the residual solids after solid-liquid equilibrium in the mixture solvent of (D)-penicillamine (a) and (D,L)-penicillamine (b).
